# Supplementary material for: Phase II trial of weekly erlotinib dosing to reduce duodenal polyp burden associated with familial adenomatous polyposis
Source: HighWire-hosted journal article supplement (doi:10.1136/gutjnl-2021-326532), 2022-05-30
Supplement: gutjnl-2021-326532supp002_data_supplement.pdf [file gutjnl-2021-326532supp002_data_supplement.pdf]

**Supplemental Table 1A: Change in duodenal polyp burden in those with a genetic diagnosis of FAP**

|                                       | No. of Participants | Baseline, Mean (SD) | Month 6, Mean (SD) | Change (Month 6 - Baseline), Mean (SD) |                     |                   | P-Value             |
|---------------------------------------|---------------------|---------------------|--------------------|----------------------------------------|---------------------|-------------------|---------------------|
|                                       |                     |                     |                    | Absolute Change Mean (SD)              | % change, Mean (SD) | % Change (95% CI) |                     |
| <b>Duodenal Polyp Burden, mm</b>      |                     |                     |                    |                                        |                     |                   |                     |
| <b>All Evaluable Participants</b>     | 36                  | 143.8<br>(117.41)   | 101.4<br>(84.48)   | -42.3<br>(69.11)                       | -29.1<br>(33.61)    | -40.5 to -17.8    | <.0001 <sup>1</sup> |
| <b>Severity of Duodenal Polyposis</b> |                     |                     |                    |                                        |                     |                   |                     |
| Spigelman 3                           | 28                  | 163.2<br>(125.97)   | 116.0<br>(89.45)   | -47.3<br>(76.51)                       | -27.2<br>(34.58)    | -40.7 to 13.8     | 0.0003 <sup>1</sup> |
| Spigelman 2                           | 8                   | 75.8 (30.28)        | 50.6<br>(32.02)    | -25.1<br>(29.52)                       | -35.8<br>(31.16)    | -61.9 to -9.8     | 0.0141 <sup>1</sup> |
| <b>Rash Acneiform/Maculo-Papular</b>  |                     |                     |                    |                                        |                     |                   |                     |
| Yes                                   | 19                  | 163.5<br>(145.34)   | 112.6<br>(99.45)   | -50.8<br>(90.16)                       | -29.9<br>(39.51)    | -48.9 to 10.8     | 0.0040 <sup>1</sup> |
| No                                    | 17                  | 121.8<br>(73.58)    | 88.9<br>(64.58)    | -32.8<br>(33.49)                       | -28.3<br>(26.73)    | -42.1 to 14.6     | 0.0005 <sup>1</sup> |
| <b>Sex</b>                            |                     |                     |                    |                                        |                     |                   |                     |
| Female                                | 16                  | 135.6<br>(92.43)    | 100.9<br>(70.81)   | -34.7<br>(36.32)                       | -27.6<br>(24.52)    | -40.7 to -14.6    | 0.0004 <sup>1</sup> |
| Male                                  | 20                  | 150.4<br>(136.18)   | 101.9<br>(95.85)   | -48.5<br>(87.58)                       | -30.4<br>(40.04)    | -49.1 to -11.6    | 0.0031 <sup>1</sup> |
| <b>Median Age</b>                     |                     |                     |                    |                                        |                     |                   |                     |
| <=42                                  | 16                  | 137.6<br>(104.91)   | 90.2<br>(87.38)    | -47.4<br>(44.56)                       | -40.0<br>(24.76)    | -53.2 to -26.8    | <.0001 <sup>1</sup> |
| >42                                   | 20                  | 148.8<br>(129.02)   | 110.5<br>(83.23)   | -38.3<br>(84.82)                       | -20.5<br>(37.67)    | -38.1 to -2.8     | 0.0252 <sup>1</sup> |

Abbreviations: SD, standard deviation; CI, confidence interval; FAP, familial adenomatous polyposis; APC, aerobic plate count

<sup>1</sup>Paired t-test of observed mean change, %, against 0%; <sup>2</sup>Paired signed rank test of observed median change, %, against 0%

**Supplemental Table 1B: Change in duodenal polyp number in those with a genetic diagnosis of FAP**

|                                       | No. of Participants | Baseline, Mean ( $\pm$ SD) | Month 6, Mean ( $\pm$ SD) | Change (Month 6 - Baseline), Mean (SD) |                           |                   | P-Value             |
|---------------------------------------|---------------------|----------------------------|---------------------------|----------------------------------------|---------------------------|-------------------|---------------------|
|                                       |                     |                            |                           | Absolute Change Mean ( $\pm$ SD)       | % Change Mean ( $\pm$ SD) | % Change (95% CI) |                     |
| <b>Number of Duodenal Polyps</b>      |                     |                            |                           |                                        |                           |                   |                     |
| <b>All Evaluable Participants</b>     | 36                  | 46.1 (38.36)               | 32.1 (31.31)              | -14.0 (24.25)                          | -11.9 (15.86)             | -17.3 to -6.6     | <.0001 <sup>1</sup> |
| <b>Severity of Duodenal Polyposis</b> |                     |                            |                           |                                        |                           |                   |                     |
| Spigelman 3                           | 28                  | 50.1 (41.50)               | 35.8 (34.16)              | -14.4 (25.56)                          | -10.4 (13.20)             | -15.5 to -5.2     | 0.0003 <sup>1</sup> |
| Spigelman 2                           | 8                   | 32.1 (20.66)               | 19.3 (12.58)              | -12.9 (20.45)                          | -17.5 (23.25)             | -36.9 to 2.0      | 0.0712 <sup>1</sup> |
| <b>Rash Acneiform/Maculo-Papular</b>  |                     |                            |                           |                                        |                           |                   |                     |
| Yes                                   | 19                  | 50.8 (47.75)               | 32.5 (35.27)              | -18.3 (28.59)                          | -12.1 (12.61)             | -18.2 to -6.1     | 0.0005 <sup>1</sup> |
| No                                    | 17                  | 40.9 (24.46)               | 31.6 (27.29)              | -9.2 (17.89)                           | -11.7 (19.27)             | -21.6 to -1.8     | 0.0202 <sup>2</sup> |
| <b>Sex</b>                            |                     |                            |                           |                                        |                           |                   |                     |
| Female                                | 16                  | 38.5 (22.96)               | 38.5 (22.96)              | -9.1 (11.48)                           | -8.5 (10.76)              | -14.2 to -2.7     | 0.0067 <sup>1</sup> |
| Male                                  | 20                  | 52.2 (46.97)               | 34.3 (37.18)              | -18.0 (30.70)                          | -14.7 (18.80)             | -23.5 to -5.9     | 0.0024 <sup>1</sup> |
| <b>Median Age</b>                     |                     |                            |                           |                                        |                           |                   |                     |
| $\leq$ 42                             | 16                  | 45.8 (30.41)               | 33.4 (34.06)              | -12.4 (20.79)                          | -13.9 (17.26)             | -23.0 to -4.7     | 0.0058 <sup>1</sup> |
| >42                                   | 20                  | 46.4 (44.50)               | 31.1 (29.79)              | -15.3 (27.17)                          | -10.4 (14.91)             | -17.4 to -3.4     | 0.0056 <sup>1</sup> |

Abbreviations: SD, standard deviation; CI, confidence interval; FAP, familial adenomatous polyposis; APC, aerobic plate count

<sup>1</sup>Paired t-test of observed mean change, %, against 0%; <sup>2</sup>Paired signed rank test of observed median change, %, against 0%

**Supplemental Table 2: Change in lower GI polyp number and burden from baseline**

|                                                                                                                                | No. of Participants | Baseline, Median (IQR) | Month 6, Median (IQR)  | Change (Month 6 - Baseline), Median (IQR) |                          | P-Value             |
|--------------------------------------------------------------------------------------------------------------------------------|---------------------|------------------------|------------------------|-------------------------------------------|--------------------------|---------------------|
|                                                                                                                                |                     |                        |                        | Median Change                             | Median Change, %         |                     |
| <b>No. of Lower GI Polyps</b>                                                                                                  |                     |                        |                        |                                           |                          |                     |
| <b>All Evaluable Participants</b>                                                                                              | 18                  | 25.0<br>(5.0 to 67.0)  | 20.0<br>(4.0 to 47.0)  | -6.0<br>(-26.0 to 0.0)                    | -30.8<br>(-47.4 to 0.0)  | 0.0256 <sup>1</sup> |
| <b>Lower GI Status</b>                                                                                                         |                     |                        |                        |                                           |                          |                     |
| IPAA                                                                                                                           | 6                   | 3.5<br>(0.0 to 20.0)   | 5.0<br>(0.0 to 6.0)    | -1.0<br>(-14.0 to 1.0)                    | -50.4<br>(-85.0 to -5.4) | 0.2500 <sup>1</sup> |
| IRA with Rectal Stump                                                                                                          | 12                  | 44.0<br>(20.0 to 97.0) | 32.5<br>(20.0 to 82.0) | -14.0<br>(-29.0 to 0.0)                   | -30.6<br>(-36.7 to 0.0)  | 0.1055 <sup>1</sup> |
| <b>Lower GI Polyp Burden, mm</b>                                                                                               |                     |                        |                        |                                           |                          |                     |
| <b>All Evaluable Participants</b>                                                                                              | 11                  | 4.0<br>(2.5 to 6.0)    | 3.5<br>(2.1 to 5.0)    | 0.0<br>(0.0 to 1.0)                       | 0.0<br>(0.0 to 25.0)     | 0.7031 <sup>1</sup> |
| <b>Lower GI Status</b>                                                                                                         |                     |                        |                        |                                           |                          |                     |
| IPAA                                                                                                                           | 3                   | 4.0<br>(3.0 to 4.0)    | 5.0<br>(4.0 to 5.0)    | 1.0<br>(-1.0 to 1.0)                      | 25.0<br>(-25.0 to 25.0)  | 1.0000 <sup>1</sup> |
| IRA with Rectal Stump                                                                                                          | 8                   | 4.5<br>(2.5 to 6.0)    | 2.7<br>(2.0 to 6.0)    | 0.0<br>(0.0 to 0.2)                       | 0.0<br>(0.0 to 12.0)     | 0.8750 <sup>1</sup> |
| Abbreviations: GI, gastrointestinal; IQR, interquartile range; IPAA, ileal pouch-anal anastomosis; IRA, ileorectal anastomosis |                     |                        |                        |                                           |                          |                     |
| <sup>1</sup> Paired signed rank test of observed median change, %, against 0%                                                  |                     |                        |                        |                                           |                          |                     |
